# Supplementary material for: Self-limiting electrospray deposition (SLED) of porous polyimide coatings as effective lithium-ion battery separator membranes
Source: Royal Society of Chemistry journal article supplement (doi:10.1039/d4lp00192c), 2024-01-01
Supplement: d4lp00192c1.pdf [file d4lp00192c1.pdf]

## Supporting Information

### Self-Limiting Electro Spray Deposition (SLED) of Polyimide Nanoparticle Coatings as Effective Battery Separator Membranes

Robert A. Green-Warren<sup>a,§</sup>, Andrew L. Fassler<sup>b,§,\*</sup>, Abigail Juhl<sup>b</sup>, Noah M. McAllister<sup>a</sup>, Andrew Huth<sup>a</sup>, Maxim Arkhipov<sup>a</sup>, Michael J. Grzenda<sup>a</sup>, S. Rahman Pejman<sup>a</sup>, Michael F. Durstock<sup>b</sup>, Jonathan P. Singer<sup>a,\*</sup>

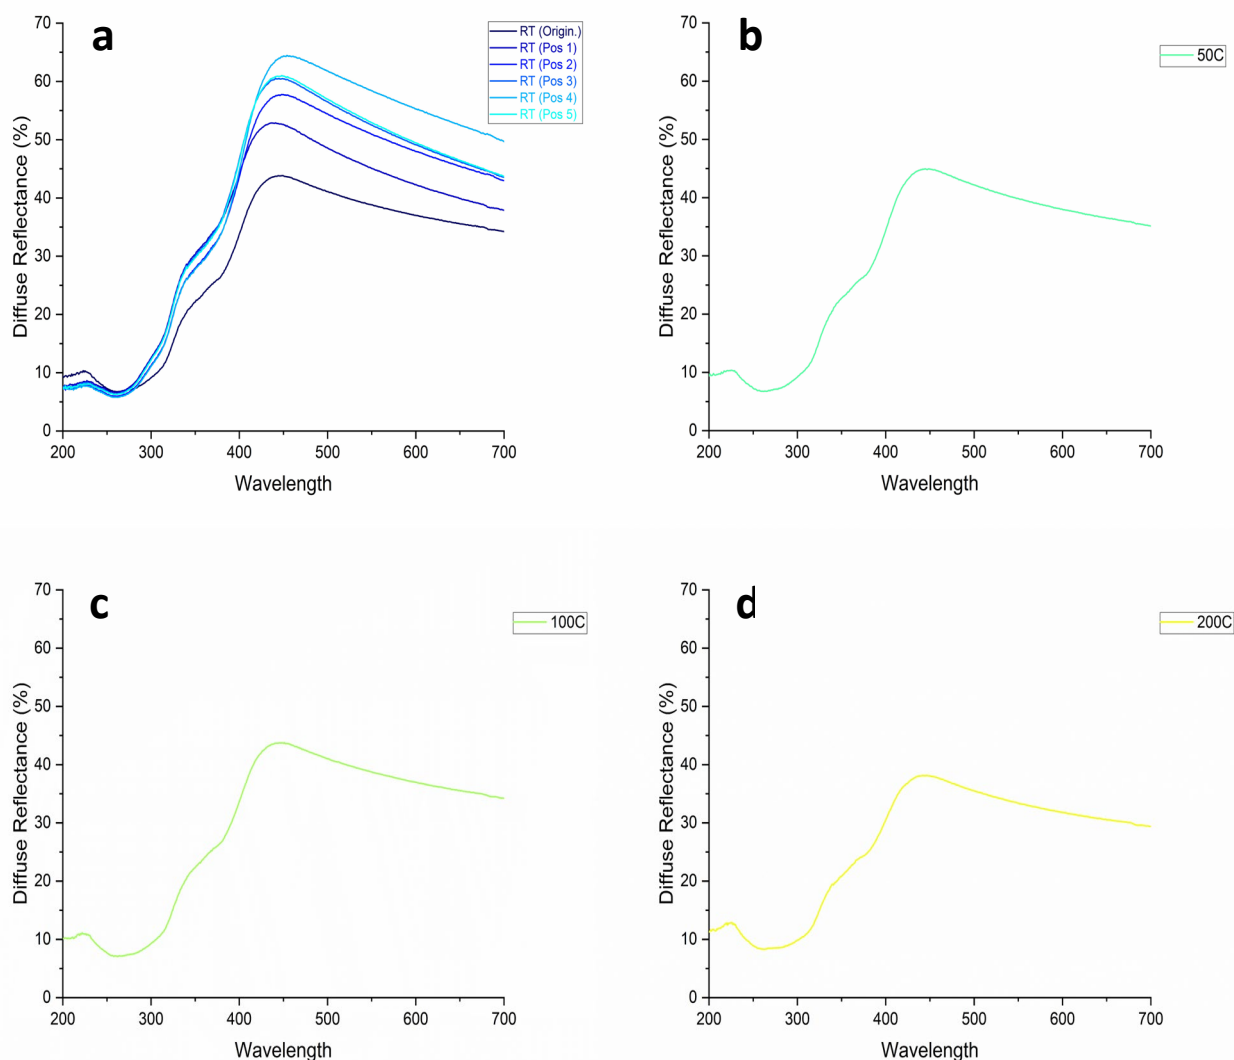

Figure S1(a-d). UV vis scattering plot of SLED PI film on Si wafer annealed at (a) room temperature (~23°C) (b) 50°C (c) 100°C (d) 200°C.

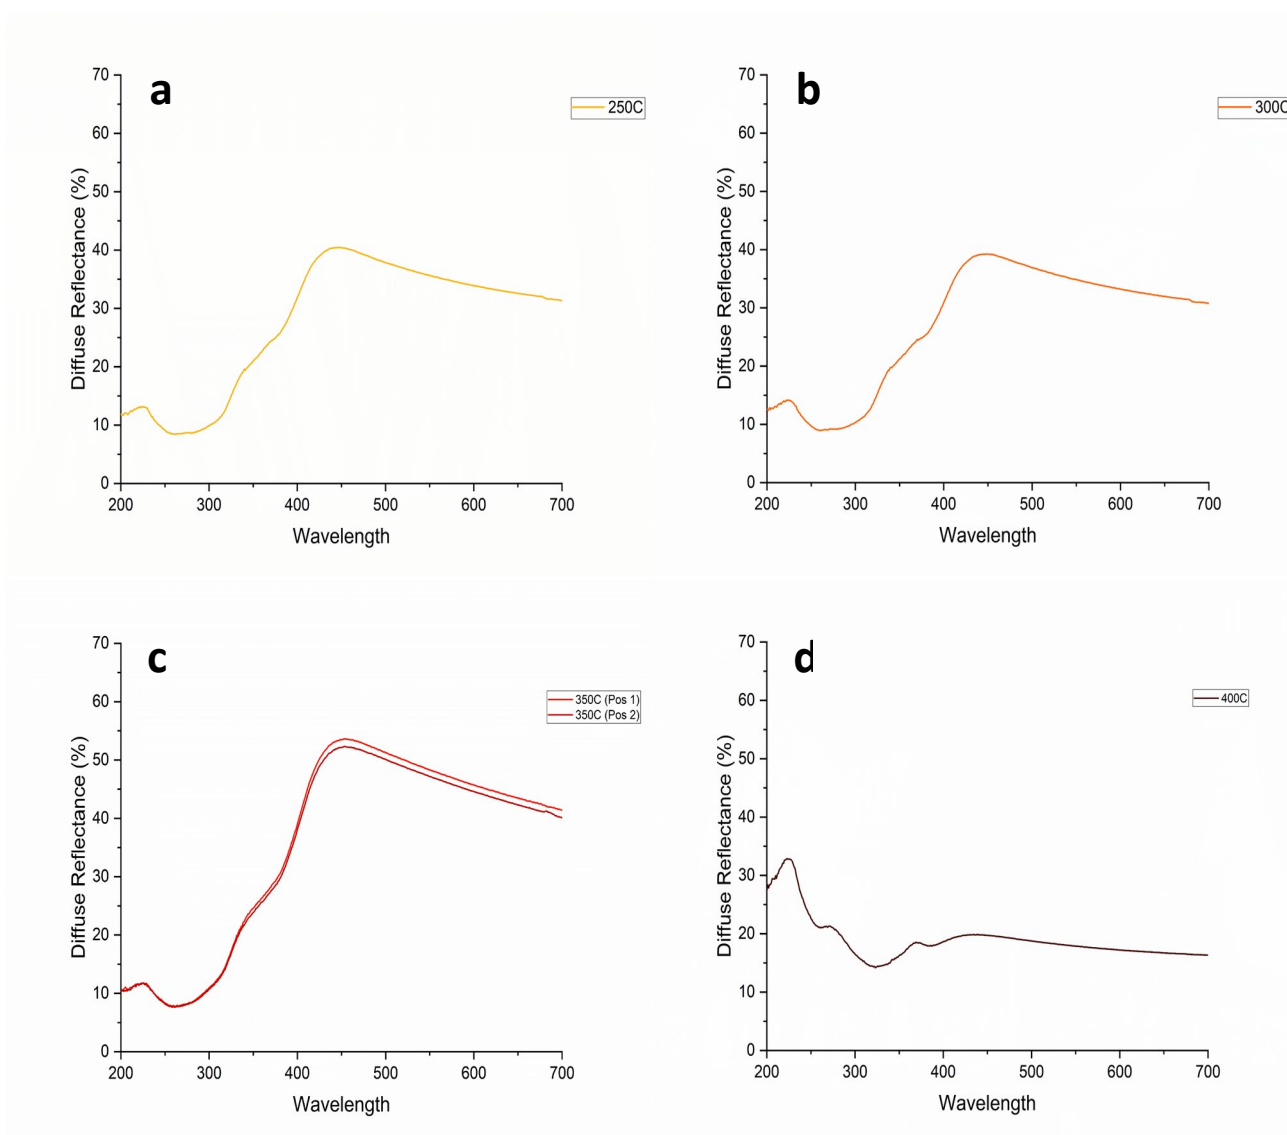

**Figure S2(a-d).** UV vis scattering plot of SLED PI film on Si wafer annealed at (a) 250°C (b) 300°C (c) 350°C (d) 400°C.

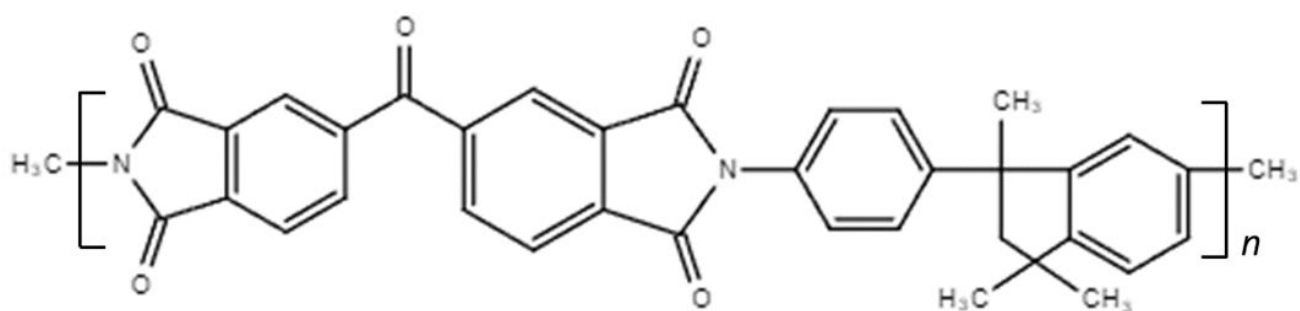

**Figure S3.** Matrimid 5218 molecular structure.

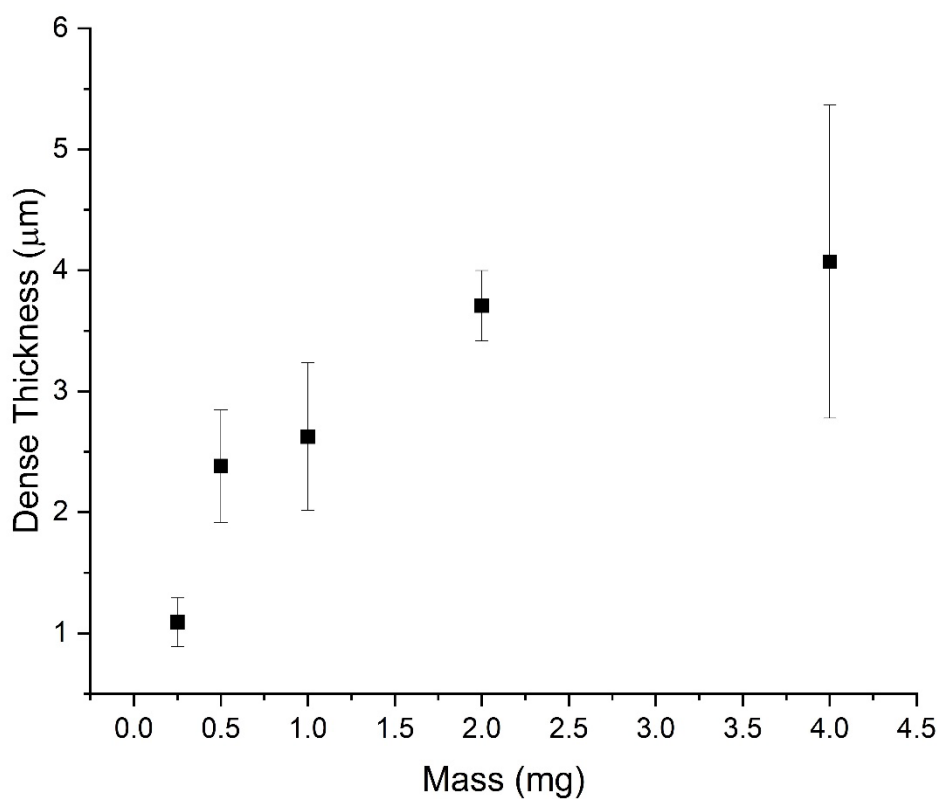

**Figure S4.** PI mass series showing dense thickness plotted against mass highlighting the self-limiting behavior of Matrimid 5218. These samples were sprayed at 0.2 mL/h at a concentration of 0.2 wt.% PI in 2:1 DCE:Chloroform to obtain the respective electrospayed mass. Each spray was conducted in a low humidity dry box between 15-20% relative humidity and a temperature range of 20-25°C.
